# Supplementary material for: Anti-Trypanosomatidae Activity of Essential Oils and Their Main Components from Selected Medicinal Plants
Source: MDPI journal article supplement (doi:10.3390/molecules28031467), 2023-02-02
Supplement: s1 [file s1]

# Anti-Trypanosomatidae Activity of Essential Oils and Their Main Components from Selected Medicinal Plants

**María Bailén <sup>1,\*</sup>, Cristina Illescas <sup>1</sup>, Mónica Quijada <sup>1</sup>, Rafael Alberto Martínez-Díaz <sup>1,†</sup>, Eneko Ochoa <sup>2</sup>,  
María Teresa Gómez-Muñoz <sup>3</sup>, Juliana Navarro-Rocha <sup>4</sup> and Azucena González-Coloma <sup>5</sup>**

<sup>1</sup> Department of Preventive Medicine, Public Health and Microbiology, Faculty of Medicine, Universidad Autónoma de Madrid, 28049 Madrid, Spain

<sup>2</sup> Research and Development Division, AleoVitro, 48160 Derio, Spain

<sup>3</sup> Department of Animal Health, Faculty of Veterinary Sciences, University Complutense of Madrid, 28040 Madrid, Spain

<sup>4</sup> Centro de Investigación y Tecnología Agroalimentaria de Aragón, Unidad de Recursos Forestales, 50059 Zaragoza, Spain

<sup>5</sup> Instituto de Ciencias Agrarias, CSIC, 28006 Madrid, Spain

\* Correspondence: maria.bailen@uam.es

† Deceased.

**Table S1.** Selected plant species, geographic location, coordinates, voucher numbers and extraction method.

| Family     | Species                                 | Localization and coordinates                                                  | Voucher number | Extraction method |
|------------|-----------------------------------------|-------------------------------------------------------------------------------|----------------|-------------------|
| Asteraceae | <i>Tanacetum vulgare</i>                | Ejea de los Caballeros (Spain)<br>(42.13460057158429, -<br>1.209717966420778) | R310457        | HD                |
| Lamiaceae  | <i>Lavandula x intermedia "Grosso"*</i> | Ejea de los Caballeros (Spain)<br>(42.13460057158429, -<br>1.209717966420778) | R310458        | SD                |
|            | <i>Lavandula x intermedia "Grosso"*</i> | Ejea de los Caballeros (Spain)<br>(42.13460057158429, -<br>1.209717966420778) | R310458        | HD                |
|            | <i>Salvia blancoana</i>                 | Ejea de los Caballeros (Spain)<br>(42.13460057158429, -<br>1.209717966420778) | R310459        | HD                |
|            | <i>Thymus mastichina</i>                | Ejea de los Caballeros (Spain)<br>(42.13460057158429, -<br>1.209717966420778) | R310460        | HD                |

\*Sterile clones multiplied by cuts.



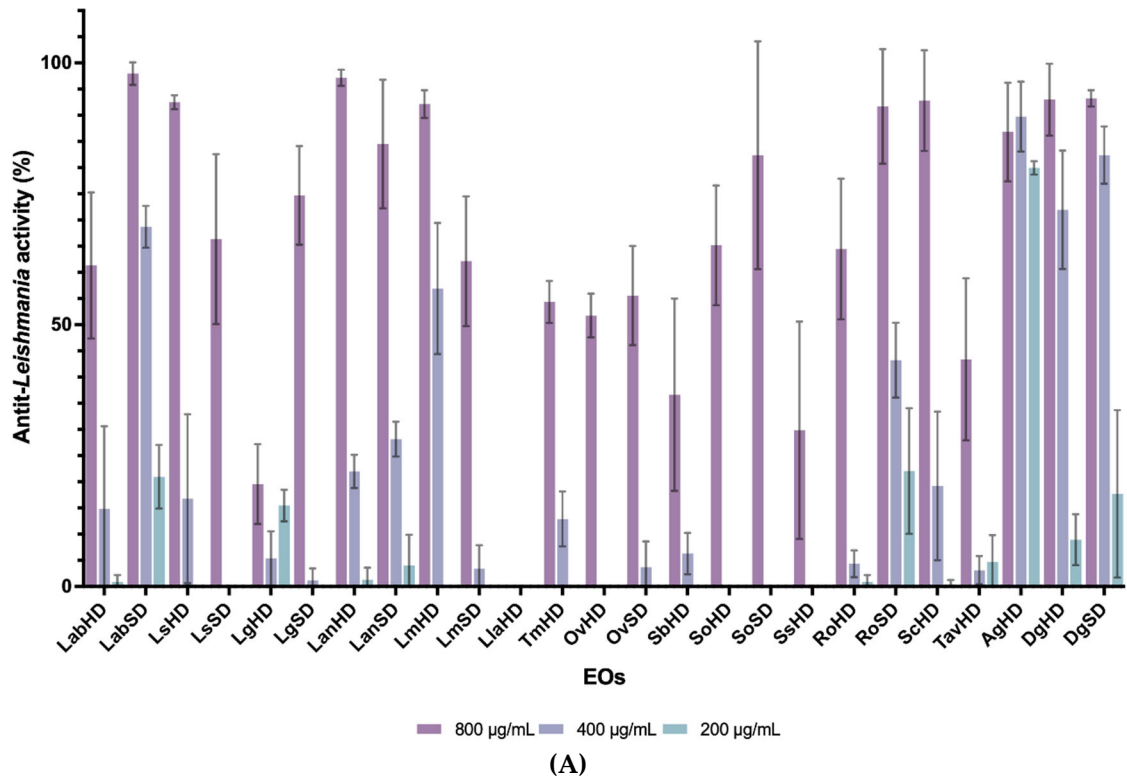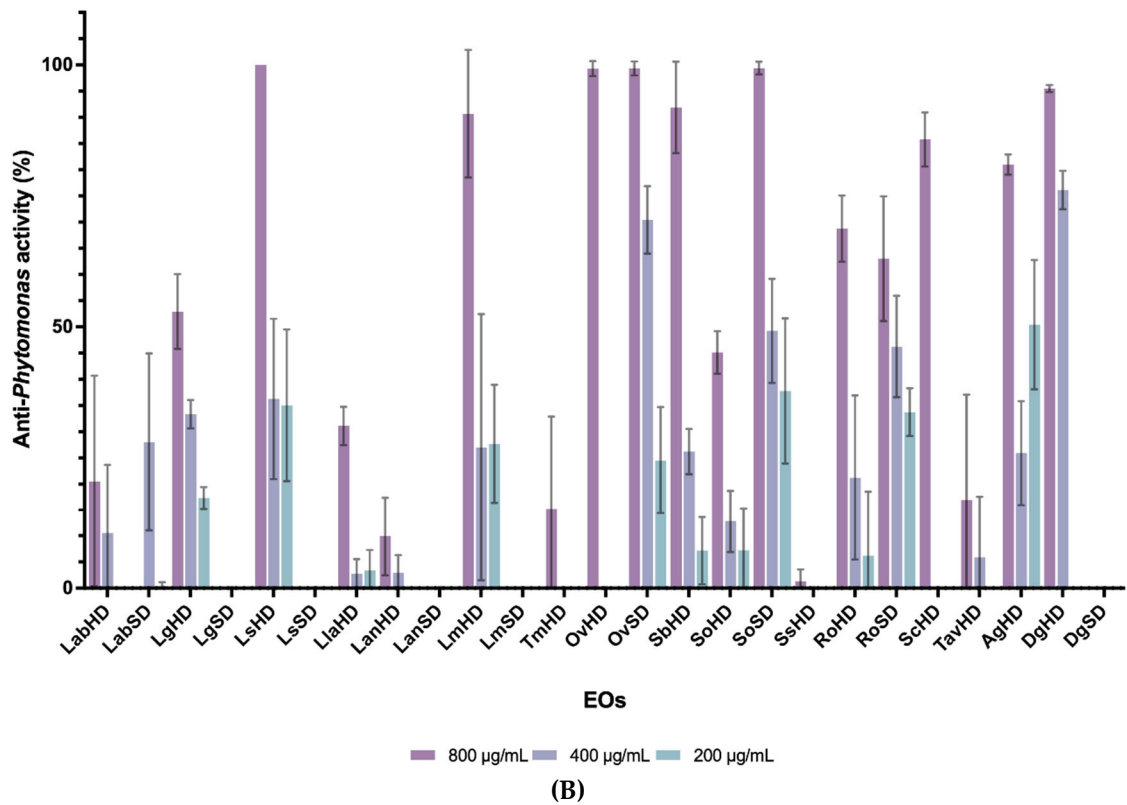

**Figure S1.** Percentage of antiprotozoal activity of EOs obtained by hydrodistillation (HD) and steam distillation (SD) from *L. x intermedia* “Abrial” (Lab), *L. x intermedia* “Grosso” (Lg), *L. x intermedia* “Super” (Lsu), *L. lanata* (Li), *L. angustifolia* (La), *L. mallele* (Lm), *T. mastichina* (Tm), *O. virens* (Ov), *S. blancoana* (Sb), *S. officinalis* (So), *S. sclarea* (Ss), *R. officinalis* (Ro), *S. chamaecyparissus* (Sc), *T. vulgare* (Tav), *D. graveolens* (Dg). A. Anti-*Leishmania* activity. B. Anti-*Phytomonas* activity of EOs.

L11 HD

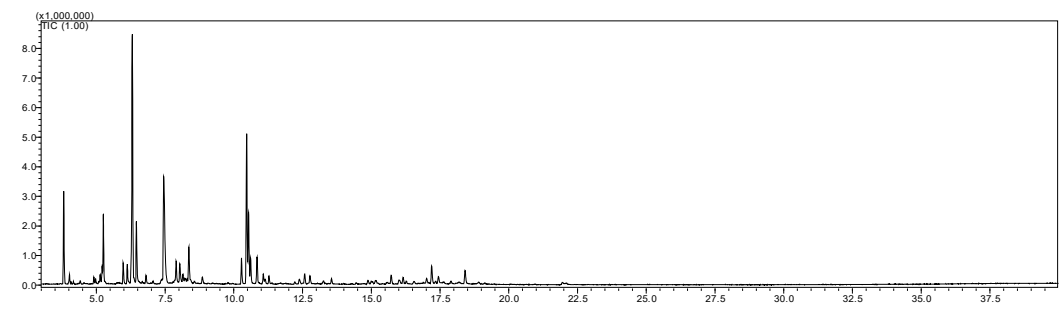

L11 SD

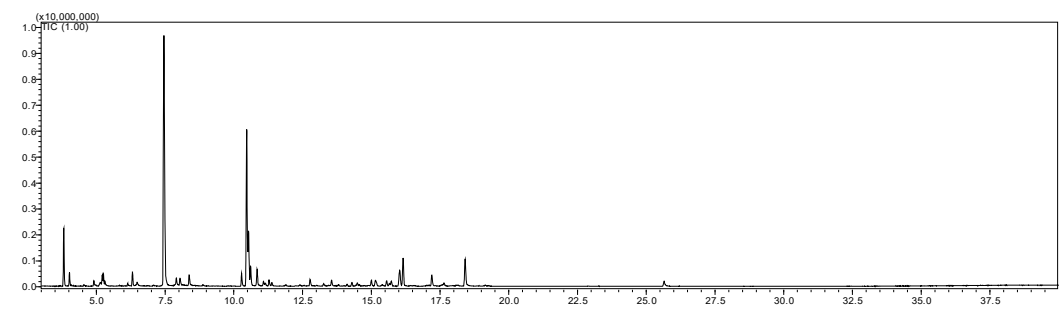

L12 HD

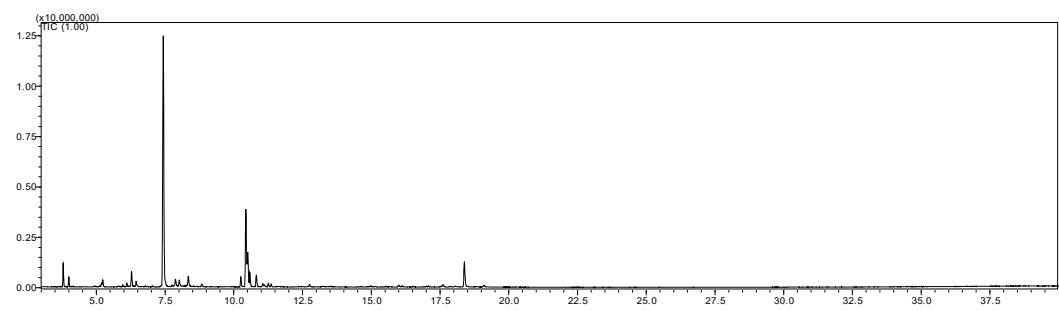

L12 SD

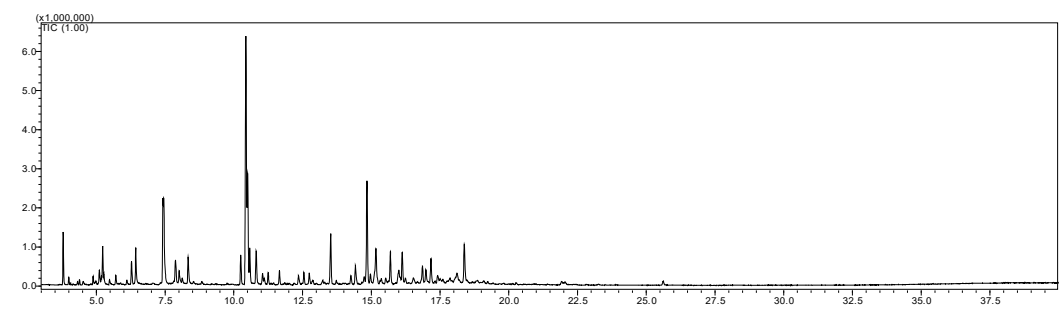

Ms HD

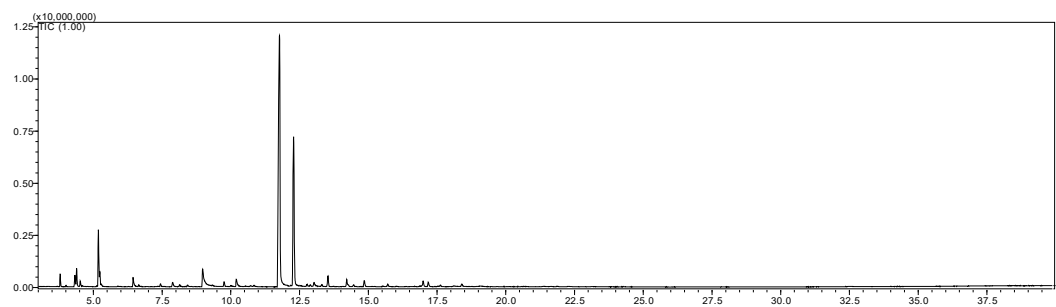

## Ms SD

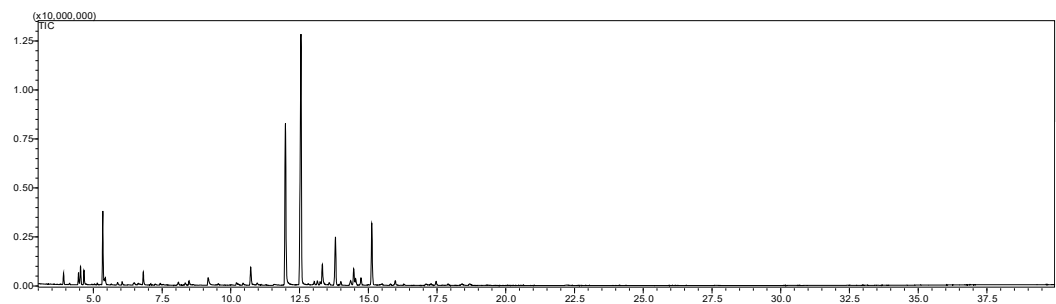

## Sh HD

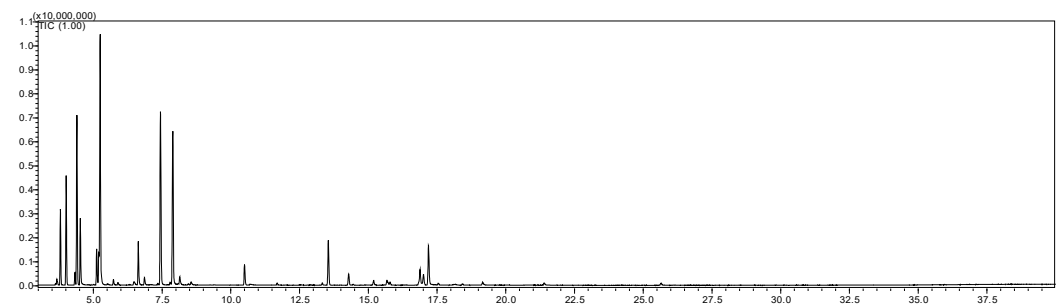

## Sm HD

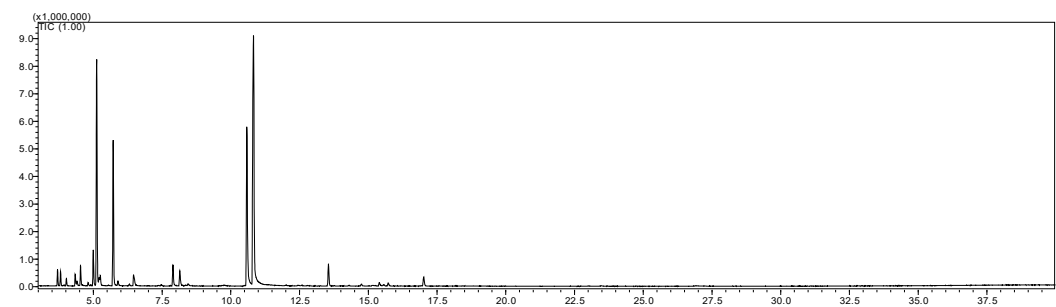

## Sm SD

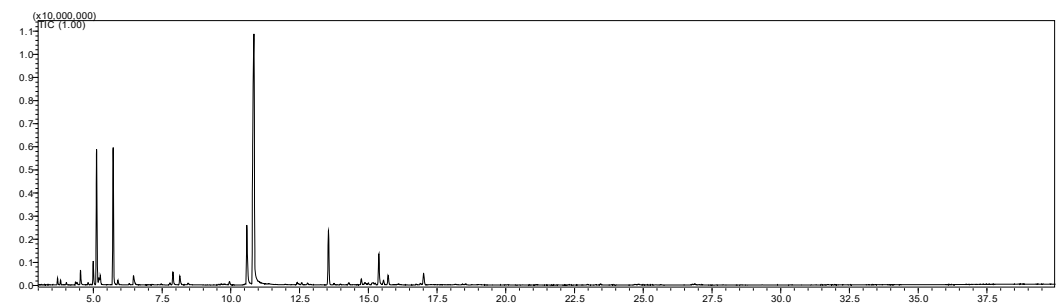

### Tv HD

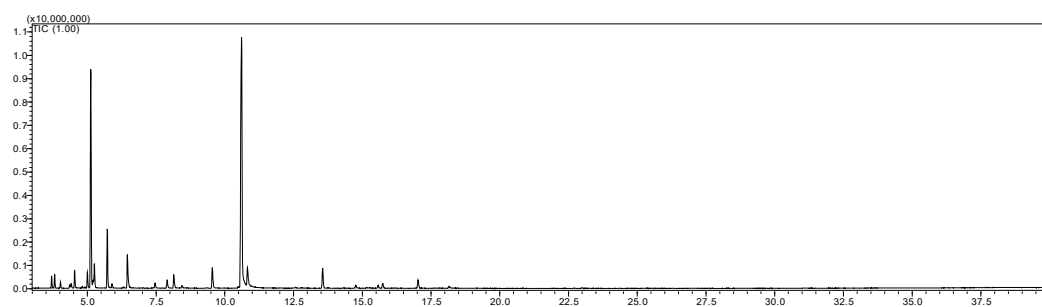

### Tv SD

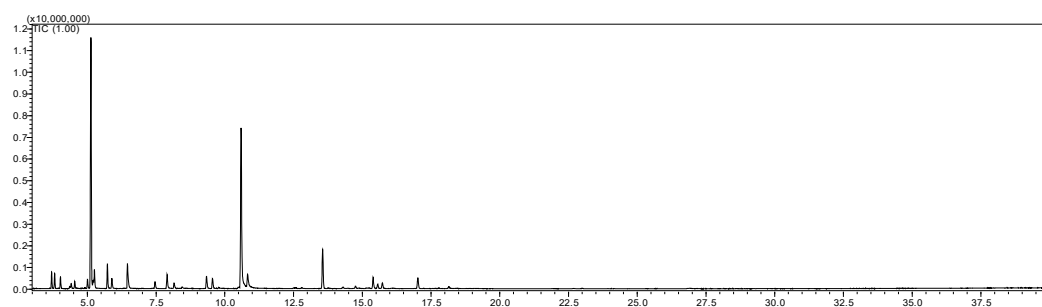

### Tz HD

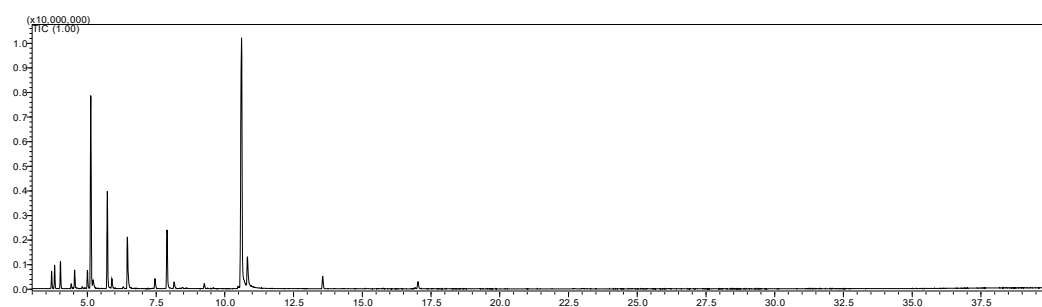

### Tz SD

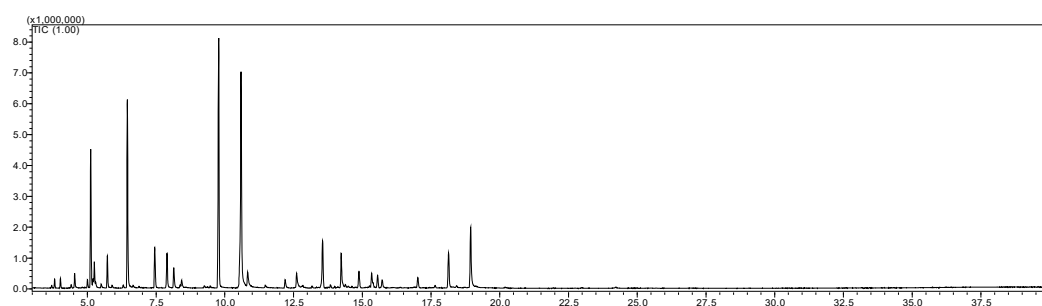

**Figure S2.** Chromatograms of the most active species EOs: *L. luisieri* (1 and 2) (Ll1 and Ll2), *M. suaveolens* (Ms); *S. hybrid* (Sh), *S. montana* (Sm), *T. vulgaris* (Tv), and *T. zygis* (Tz); HD, EOs obtained by hydrodistillation; SD, EOs obtained by steam distillation.
